# Supplementary material
Source: ML conference proceedings conference paper supplement (https://openaccess.thecvf.com/content/ICCV2023/html/Wang_V3Det_Vast_Vocabulary_Visual_Detection_Dataset_ICCV_2023_paper.html)
Supplement: Supplementary file 1 [file Wang_V3Det_Vast_Vocabulary_Visual_Detection_Dataset_ICCV_2023_supplemental.pdf]

# V3Det: Vast Vocabulary Visual Detection Dataset

## Supplementary Materials

Jiaqi Wang<sup>\*1</sup>, Pan Zhang<sup>\*1</sup>, Tao Chu<sup>\*1</sup>, Yuhang Cao<sup>\*2</sup>,  
Yujie Zhou<sup>1</sup>, Tong Wu<sup>2</sup>, Bin Wang<sup>1</sup>, Conghui He<sup>1</sup>, Dahua Lin<sup>1,2,3</sup>  
<sup>1</sup>Shanghai AI Laboratory, <sup>2</sup>The Chinese University of Hong Kong,  
<sup>3</sup>Centre of Perceptual and Interactive Intelligence

{wangjiaqi, zhangpan}@pjlab.org.cn, dhlin@ie.cuhk.edu.hk

In the supplementary materials, we introduce the license of V3Det dataset in Appendix A, more implementation details in Appendix B, and more experimental results in Appendix C. We show a more detailed visualization of the hierarchy category organization of V3Det in Appendix D, the list of coarse categories which is used during annotation process in Appendix E, some examples of category descriptions written by human experts and a powerful chatbot, *i.e.*, chatgpt<sup>1</sup> in Appendix F, and more visualizations of the V3Det dataset in Appendix G.

### A. V3Det Dataset License and Download.

**V3Det Images.** Around 90% of the images in V3Det were selected from the Bamboo Dataset [20], sourced from the Flickr website. The remaining 10% were directly crawled from the Flickr. We do not own the copyright of the images. Use of the images must abide by the Flickr Terms of Use<sup>2</sup>. We only provide lists of image URLs without redistribution.

**V3Det Annotations.** The V3Det annotations, the category relationship tree, and related tools are licensed under a Creative Commons Attribution 4.0 License<sup>3</sup>.

**V3Det Download.** The metafile of image URLs, a script to easily download images, annotations, the category relationship tree, and other related tools are available at <https://v3det.openxlab.org.cn/>.

### B. Implementation Details.

#### B.1. Vast Vocabulary Object Detection.

**Two Stage and Cascaded Detectors.** We test three representative two-stage or cascaded detectors with ResNet-50 [9] and Swin-B [12] backbones, *i.e.*, Faster R-CNN [15], Cascade R-CNN [2], and CenterNet2 [23]. For Faster R-

CNN and Cascade R-CNN, we adopt their standard implementations in mmdetection [4]. For CenterNet2, we adopt its official implementation based on Detectron2 [18]. To have a fair comparison, FPN [11], AdamW optimizer [13], multi-scale augmentation, and repeat factor sampler [8] training are adopted in experiments. Specifically, we use AdamW optimizer [10] with learning rate of  $10^{-4}$ ,  $\beta_1=0.9$ ,  $\beta_2=0.999$ , and batchsize of 32. Following the best practices on LVIS [8] dataset, we use multi-scale augmentation training by randomly selecting the shorter side of the image from (640, 672, 704, 736, 768, 800) pixels and the longer size of the image less than 1333 pixels. Following LVIS [8], we set the repeat factor to  $10^{-3}$  in the repeat factor sampler [8]. The detectors are trained with 24 epochs, where the learning rate is decreased by  $10\times$  at 16 and 22 epochs.

**Single Stage Detectors.** We adopt the standard implementation of ATSS [3] and FCOS [16] in mmdetection [4] as representative single stage detectors. Other settings follow the experiments on two stage and cascaded detectors.

**DETR Style Detectors.** We test two DETR-style detectors, Deformable DETR [24], and DINO [19] with two different backbones, ResNet-50 [9], and Swin-B [12]. We implement Deformable DETR with mmdetection [4] and train it with batch size 32 for 50 epochs with the learning rate of  $2 \times 10^{-4}$ . We implement DINO with detrex [5] and train it with batch size 16 for 24 epochs with the learning rate of  $10^{-4}$ . Both models are trained with AdamW optimizer [10] with  $\beta_1=0.9$ ,  $\beta_2=0.999$  and repeat factor sampler with factor of  $10^{-3}$ . We follow the default data augmentation that is adopted in the corresponding framework.

#### B.2. Open Vocabulary Object Detection (OVD).

In this section, we provide the implementation details of training Detic [22] and RegionCLIP [21] on V3Det.

For Detic, we follow the original paper that uses CenterNet2 [23] with ResNet-50 [9]. We adopt large-scale jittering [7] with an input resolution of 640x640. The batch size

\* equal contribution.

<sup>1</sup><https://openai.com/blog/chatgpt>

<sup>2</sup><https://www.flickr.com/creativecommons/>

<sup>3</sup><https://creativecommons.org/licenses/by/4.0/>

| Pretrain (1st) | Pretrain (2st) | Finetune | AP   |
|----------------|----------------|----------|------|
| -              | -              | LVIS     | 35.1 |
| V3Det          | -              | LVIS     | 36.2 |
| Objects365     | -              | LVIS     | 36.9 |
| V3Det          | Objects365     | LVIS     | 37.3 |
| Objects365     | V3Det          | LVIS     | 37.7 |

Table A1: Comparisons of different strategies when pretraining a CenterNet2 using R-50 backbone and Norm Linear Layer on V3Det and Objects365, followed by finetuning on LVIS. For each stage, the training schedule is 90k iterations of batch size 64.

is 64, and the learning rate is  $2 \times 10^{-4}$  with the AdamW optimizer. For results in main text Table 6, we first train a model on base classes  $C_{base}$  of V3Det for 90k iterations. We then create a subset of ImageNet-21K, named IN-V3Det, which contains 4197 overlapped classes with V3Det. We then do a multi-dataset finetuning on V3Det and IN-V3Det for 90k iterations. For results in main text Table 8, Detic of V3Det\* is only trained on V3Det\* without ImageNet images for 180k iterations.

For RegionCLIP, following the original paper, we utilize Faster R-CNN [15] with ResNet-50 [9] backbone that is finetuned by CLIP-guided region-text alignment. Initially, the offline Region Proposal Network (RPN) [15] is trained on the base categories for 180k iterations. Subsequently, the finetune stage is applied to transfer the learned knowledge of region-text alignment to open-vocabulary detection for 180k iterations. During training, a batch size of 16 images and an initial learning rate of  $2 \times 10^{-3}$  are utilized.

### C. More Experimental Results.

**V3Det for pretraining.** V3Det aims to be a benchmark for vast-vocabulary and open-vocabulary object detection. Interestingly, our findings indicate that V3Det can additionally be employed effectively as a pretraining dataset. We conducted comparative analyses of diverse strategies for pretraining a CenterNet2 [23] with R-50 on datasets V3Det and Objects365. Subsequent finetuning was performed on the LVIS dataset to assess the effectiveness of the initial pretraining. Table A1 shows that V3Det and Objects365 exhibit comparable performance and can complement each other for pretraining.

**Ablation on Norm Linear Layer.** In the experiments of Table 2 and Table 4 in the main text, we show the effectiveness of Norm Linear Layer [17],  $z = \tau \widetilde{\mathcal{W}}^T \widetilde{x} + b$ , where  $\widetilde{\mathcal{W}}_i = \frac{\mathcal{W}_i}{\|\mathcal{W}_i\|_2}$ ,  $i \in C$ ,  $\widetilde{x} = \frac{x}{\|x\|_2}$ . As shown in Table A2, we explore its temperature factor  $\tau$ , and find that the best performance is achieved when  $\tau$  is 50. Therefore, we adopt  $\tau$  of 50 as the default setting in experiments.

**Different Stages in Cascaded R-CNN.** As in Table A3, we show the performance of Cascade R-CNN [2] ResNet-50 at different stages. The AP increases as the stage grows, demonstrating the effectiveness of cascading refinement

| $\tau$ | AP          | AP <sub>50</sub> | AP <sub>75</sub> |
|--------|-------------|------------------|------------------|
| 30     | 27.4        | 32.9             | 29.7             |
| 40     | 27.8        | 34.0             | 30.3             |
| 50     | <b>28.3</b> | <b>34.5</b>      | <b>30.8</b>      |
| 60     | 27.8        | 33.9             | 30.3             |

Table A2: Comparisons of different temperature factors  $\tau$  in Norm Linear Layer. Cascade R-CNN ResNet-50 trained for 12 epochs with the AdamW optimizer is the framework in this table.

| Stage                   | AP          | AP50        | AP75        |
|-------------------------|-------------|-------------|-------------|
| Faster R-CNN [15]       | 21.2        | 29.5        | 24.1        |
| Cascade R-CNN stage 1   | 22.7        | 31.1        | 25.8        |
| Cascade R-CNN stage 2   | 27.0        | 33.7        | 29.7        |
| Cascade R-CNN all stage | <b>28.3</b> | <b>34.5</b> | <b>30.8</b> |

Table A3: Performance of Cascade R-CNN at different stages.

| Method                                     | Split | AP   | AP <sub>50</sub> | AP <sub>75</sub> |
|--------------------------------------------|-------|------|------------------|------------------|
| Cascade R-CNN [2] + Norm Linear Layer [17] | val   | 42.5 | 49.1             | 44.9             |
|                                            | test  | 43.1 | 49.7             | 45.6             |
| DINO [19]                                  | val   | 42.0 | 46.8             | 43.9             |
|                                            | test  | 42.4 | 47.2             | 44.3             |

Table A4: Performance differences between *val* and *test* split.

| Dataset  | AP          | CLS ER       | LOC ER      |
|----------|-------------|--------------|-------------|
| LVIS [8] | <b>62.2</b> | 7.69         | <b>4.78</b> |
| V3Det    | 49.4        | <b>25.32</b> | 0.75        |

Table A5: Comparison of classification error (CLS ER) and localization error (LOC ER) of EVA [6] on LVIS [8] and V3Det.

cascade. On the other hand, the AP of Cascade R-CNN at stage 1 is 22.7, which is still higher than the AP of Faster R-CNN [15], which is 21.2, indicating the structure of stage cascade is beneficial to the model optimization.

**Performance Differences Between *Val* and *Test* Split.** In Table A4, we evaluate Cascade R-CNN [2] + Norm Linear Layer [17] and DINO [19] with 24 epochs, AdamW optimizer and Swin-B backbone on *val* and *test* split of V3Det, showing the annotation consistency of the two splits.

**EVA Error Analysis.** Table 5 in the main text shows the AP of EVA [6] on V3Det is 49.4, which is 12.8 lower than the AP on LVIS [8], which is 62.2. In this section, we explore the error source of the AP difference. Table A5 compares the classification and localization errors of EVA on LVIS and V3Det, computed by TIDE [1]. Classification error indicates localized correctly (IoU > 0.5) but classified incorrectly; Localization error indicates classified correctly but localized incorrectly (IoU < 0.5). We can see the localization error of V3Det (0.75) is lower than LVIS (4.78), but the classification error of V3Det (25.32) is much higher than LVIS (7.69). This confirms V3Det exposes a more challenging vast vocabulary classification problem than LVIS, leading to a broader exploration space.

**Hierarchy Open Vocabulary Test.** To comprehensively

| Method          | $AP^v$ | $AP^h$ | H-score |
|-----------------|--------|--------|---------|
| Detic [22]      | 7.25   | 16.90  | 42.90   |
| RegionCLIP [21] | 5.58   | 11.70  | 47.69   |

Table A6: The results of the hierarchy open vocabulary test.

evaluate the open-vocabulary detectors, we propose a hierarchy open vocabulary test to evaluate the hierarchy capability of the detector, which is built upon our hierarchy category organization. Firstly, we employ two distinct methodologies for assessing the Average Precision metric of non-leaf nodes. One is Vocabulary based Non-leaf Average Precision  $AP^v$ , defined as

$$AP^v = \frac{1}{N} \sum_{i \in \{\text{non-leaf nodes}\}} AP(P_i, f_i(Y)), \quad (1)$$

$$f_i(Y) = \{y | y \in Y \text{ and } y \in \text{descendants of node } i\},$$

where  $N$  is total number of non-leaf nodes in the hierarchy tree.  $P_i$  is the predicted boxes of non-leaf node  $i$ .  $Y$  is the ground truth of all leaf nodes.  $f_i(Y)$  is all ground truth of the descendants of node  $i$ .  $AP(\alpha, \beta)$  is the Average Precision between boxes set  $\alpha$  and  $\beta$ . The other is Hierarchy based Non-leaf Average Precision  $AP^h$ , defined as

$$AP^h = \frac{1}{N} \sum_{i \in \{\text{non-leaf nodes}\}} AP(f_i(P), f_i(Y)), \quad (2)$$

$$f_i(P) = \{p | p \in P \text{ and } p \in \text{descendants of node } i\},$$

where  $P$  is the predicted boxes of all leaf nodes.  $f_i(P)$  is the merged predictions of the descendants belonging to node  $i$  processed by NMS with IoU threshold of 0.5.

Based on  $AP^v$  and  $AP^h$ , we design Hierarchy Score, dubbed as H-score, which is defined as

$$\text{H-score} = AP^v / (AP^h + \epsilon) \times 100, \quad (3)$$

where  $\epsilon$  is set to  $1e-6$ . A higher value of the H-score indicates a stronger hierarchical capability of the detector. Table A6 provides the results of the hierarchy open vocabulary test. Although the  $AP^v$  and  $AP^h$  of RegionCLIP are lower than that of Detic, the elevated H-score of RegionCLIP in comparison to Detic suggests a superior hierarchical capability, owing to the robustness of the leveraging CLIP[14] parameters rather than merely extracted text embeddings.

## D. Hierarchy Category Organization.

A more detailed hierarchy category organization of V3Det is shown in Figure A1.

## E. Coarse Category List.

Table A7 gives the details of the coarse-grained categories used during the annotation process, including the

name, total number of fine-grained categories in each coarse-grained category, and some fine-grained examples for each coarse-grained category.

## F. Category Descriptions Examples.

In Table A8, we show examples of category descriptions in V3Det, which is written by human experts and chatgpt.

## G. More Dataset Visualizations.

Figure A2 and Figure A3 provide some sampled images with annotations for visualization.

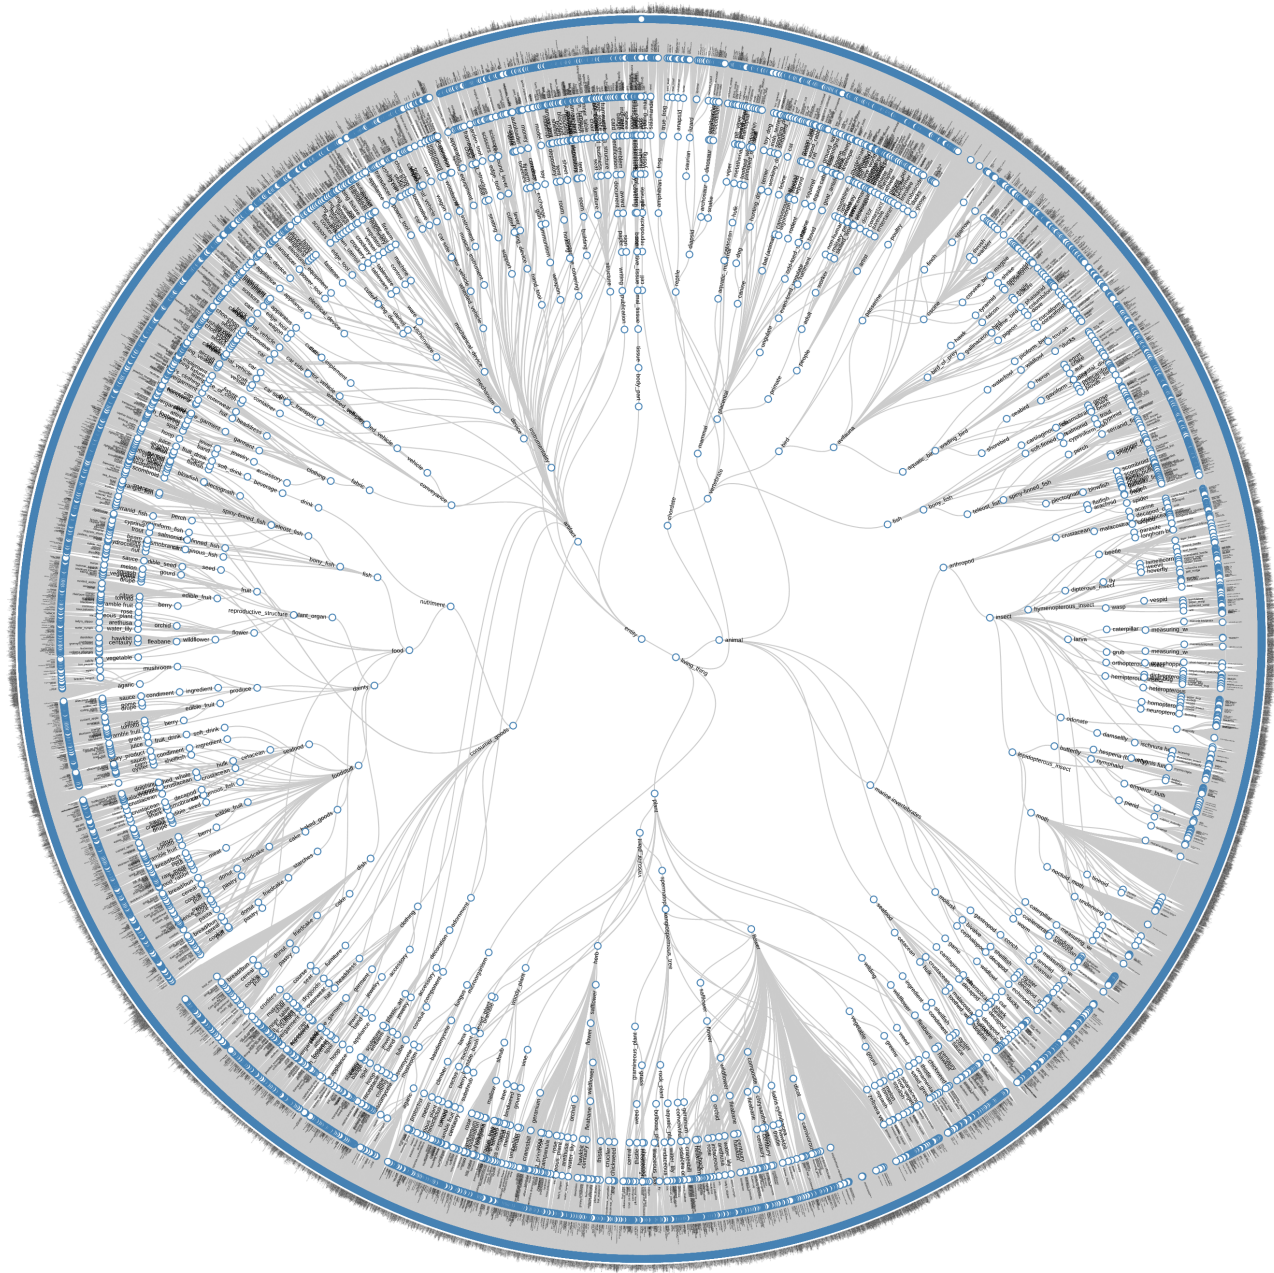

Figure A1: A Detailed Visualization of Hierarchy Category Organization in V3Det.

|           | Coarse category                                              | Numbers | List of fine-grained category                                                           |
|-----------|--------------------------------------------------------------|---------|-----------------------------------------------------------------------------------------|
| Coarse 1  | Animal & Human                                               | 7485    | siberian tiger; masai lion; net-winged insects; rugby player; man; woman; ...           |
| Coarse 2  | Device                                                       | 241     | ceiling fan; tablet computer; display device; mobile device; ipad; game controller; ... |
| Coarse 3  | Table & Chair                                                | 30      | armchair; conference table; dining table; folding chair; gateleg table; ...             |
| Coarse 4  | Flower                                                       | 1911    | hybrid tea rose; floribunda; tagetes; alpine aster; hawaiian hibiscus; orange lily; ... |
| Coarse 5  | Vegetables & Beans & Fruit & Peel                            | 696     | squash; kiwifruit; saba banana; calamondin; matoke; eastern prickly pear; ...           |
| Coarse 6  | Dishes & Meat & Staple food & Aggs<br>Bean products & Aggs   | 602     | chicken meat; fried noodles; turkey meat; hot dog bun; sliced bread; soba; ...          |
| Coarse 7  | Wearable Items                                               | 352     | baseball uniform; knit cap; martial arts uniform; dog clothes; diving mask; ...         |
| Coarse 8  | Fungus                                                       | 301     | medicinal mushroom; lingzhi mushroom; pleurotus eryngii; russula fragilis; ...          |
| Coarse 9  | Vehicle                                                      | 223     | microvan; general motors; steam car; solar vehicle; hoverboarding; ambulance; ...       |
| Coarse 10 | Sports equipment<br>w/o ball                                 | 168     | skateboard truck; freebord; training bench; pommelhorse; dart; ...                      |
| Coarse 11 | Drinks & Seasoning & Oil & Dairy products & Liquid chocolate | 113     | wiener melange; mocaccino; cream liqueur; ice cream; soy sauce; ...                     |
| Coarse 12 | Musical instrument                                           | 109     | drum stick; tabla; banjo; cymbal; drums; guitar; harp; piano; shekere; ...              |
| Coarse 13 | Hand & Ignition tools                                        | 98      | hand fan; alligator wrench; bolt cutter; cap opener; corkscrew; forceps; ...            |
| Coarse 14 | Hardware gadgets                                             | 66      | keychain; plumbing fitting; threading needle; anchor; anvil; awl; bodkin; ...           |
| Coarse 15 | Weapon w/o hacking and cutting                               | 62      | barbette carriage; battering ram; bomb; brass knucks; bullet; cannon; ...               |
| Coarse 16 | Cards & Paper products & Board                               | 62      | payment card; academic certificate; blackboard; bookmark; clipboard; doorplate; ...     |
| Coarse 17 | Cutting tool & Chop cold weapons                             | 54      | axe; bucksaw; crosscut saw; hedge trimmer; knife; cheese cutter; peeler; ...            |
| Coarse 18 | Tableware w/o electricity                                    | 53      | wine glass; stemware; barbecue grill; food steamer; cup; chopstick; fork; ...           |
| Coarse 19 | Building & Tent                                              | 51      | residential; water castle; portable toilet; cabana; bell tent; cenotaph; ...            |
| Coarse 20 | Personal care                                                | 50      | facial cleanser; baby powder; bottlebrush; condom; curler; hairbrush; ...               |
| Coarse 21 | Ball                                                         | 48      | basketball; bowling ball; cricket ball; croquet ball; golf ball; handball; ...          |
| Coarse 22 | Cactus                                                       | 39      | san pedro cactus; large-flowered cactus; ferocactus cylindraceus; ...                   |
| Coarse 23 | Window & Door & Delivery hole & Well                         | 38      | window covering; water well; artesian well; doorknob; dormer; gusher; ...               |
| Coarse 24 | Cloth & Cloth material                                       | 36      | folding napkins; bath mat; beach towel; cleaning pad; dustcloth; doily; ...             |
| Coarse 25 | Office equipment                                             | 37      | board eraser; abacus; chalk; fountain pen; marker; pencil; inkstone; ...                |
| Coarse 26 | Cleaning tools & Nozzle                                      | 35      | bathroom sink; toilet roll holder; irrigation sprinkler; bathtub; broom; dumpster; ...  |
| Coarse 27 | Measuring equipment                                          | 28      | beaker; compass; detector; divider; plumb bob; protractor; triangular ruler; ...        |
| Coarse 28 | Shelf & Storage cabinet                                      | 28      | wine rack; shoe organizer; pot rack; bookcase; clothes tree; coatrack; ...              |
| Coarse 29 | Gem & Fountain                                               | 28      | fountain; crystal; diamond; ruby; pearl; emerald; chrysoberyl; jadeite; ...             |
| Coarse 30 | Faith related objects                                        | 27      | amulet; christian cross; flag; shoulder board; totem pole; medal; ...                   |
| Coarse 31 | Medical related objects                                      | 26      | aspirator; catheter; hypodermic needle; pill; plaster; stethoscope; ...                 |
| Coarse 32 | Pole & Tube                                                  | 24      | blowgun; chimney; cigar; fire hose; grab bar; meerscham; test tube; ...                 |
| Coarse 33 | Lifesaving objects                                           | 21      | baby float; air cushion; breeches buoy; fire hydrant; life buoy; water wings; ...       |
| Coarse 34 | Bottles & Bags & Buckets & Boxes                             | 22      | weaving basket; bag; barrel; basin; bottle; briefcase; pot; rain barrel; ...            |
| Coarse 35 | Candy & Solid chocolate                                      | 21      | brittle; chewing gum; candied apple; cocoa powder; lollipop; jello; ...                 |
| Coarse 36 | Planet & Satellite                                           | 18      | satellite; meteorite; moon; sun; black hole; Earth; Mars; Mercury; Venus; ...           |

|           | Coarse category                                                     | Numbers | List of fine-grained categories                                                        |
|-----------|---------------------------------------------------------------------|---------|----------------------------------------------------------------------------------------|
| Coarse 37 | Bedding                                                             | 18      | infant bed; bed; bed pillow; bunk bed; carrycot; crib; futon; hammock; ...             |
| Coarse 38 | Chess                                                               | 16      | chessman; chess set; Chinese Chess; Go; International Draughts or Checkers; Shogi; ... |
| Coarse 39 | Bell                                                                | 12      | electric bell; timer; weathervane; wind chime; fire alarm; Windbell; bicycle bell; ... |
| Coarse 40 | Signpost & Roadblock                                                | 12      | stop sign; crosswalk sign; billboard; pedestrian crossing; yard marker; ...            |
| Coarse 41 | Control device & Heating appliances & Hot-water bag w/o electricity | 12      | brazier; gearshift; handwheel; hot-water bottle; radiator; roaster; ...                |
| Coarse 42 | Wheel shaped objects                                                | 11      | bicycle wheel; bobbin; ferris wheel; gear; inner tube; pulley; automotive tire; ...    |
| Coarse 43 | Lens                                                                | 10      | magnifying glass; microscope; telescope; Rifle scopes; Triangular Prism; ...           |
| Coarse 44 | Currency & Whistle                                                  | 8       | whistle; gold; money; cash; paper money; coinage; banknote; ...                        |
| Coarse 45 | Animal nest                                                         | 9       | birdcage; chicken coop; rabbit hutch; nest; wasp nest; cage; ...                       |
| Coarse 46 | Umbrella & Ladder                                                   | 9       | parachute; cocktail umbrella; Aluminum alloy ladder; Wooden ladder; ...                |
| Coarse 47 | Electronic component                                                | 6       | battery; capacitor; coil; resistor; solar cell; electronic component; ...              |
| Coarse 48 | Socket & Plug                                                       | 6       | bung; cork; power outlet; socket; wall socket; ...                                     |
| Coarse 49 | Lure & Aquarium & Post box                                          | 6       | aquarium; fishbowl; pillar box; Nano aquarium; Spoon lure; Penfold post box; ...       |
| Coarse 50 | Industrial machine & Spray paint                                    | 5       | concrete mixer; crane; generator; spray paint; pumpjack; ...                           |
| Coarse 51 | Spring & Magnet & Compass                                           | 4       | compass; rubber band; spring; refrigerator magnet; ...                                 |
| Coarse 52 | Popcorn machine ATM & Ashtray & Incense burner                      | 5       | ashtray; automated teller machine; censer; popper; incense burner; ...                 |
| Coarse 53 | Model                                                               | 93      | toy vehicle; rubik's cube; amphora; armillary sphere; cockhorse; doll; ...             |

Table A7: **The details of the coarse-grained categories.** All fine-grained categories are divided into 53 coarse-grained categories. 'Numbers' denotes total number of fine-grained categories in each coarse-grained category.

| Name                 | Image                                                                               | Type               | Description                                                                                                                                                                                               |
|----------------------|-------------------------------------------------------------------------------------|--------------------|-----------------------------------------------------------------------------------------------------------------------------------------------------------------------------------------------------------|
| platycercus adscitus |  | Experts<br>chatgpt | platycercus adscitus has a brown head, yellow belly and green wings<br>green body, yellow head, red markings (pale-headed rosella)                                                                        |
| Adelie penguin       |  | Experts<br>chatgpt | medium-sized penguins occurring in large colonies on the Adelie Coast of Antarctica<br>the Adelie penguin has a black head and back, white front, and a distinctive white ring around the eye             |
| polar bear           |  | Experts<br>chatgpt | compared to other bears, smaller head, round ears, slender neck. Black skin, huge and ferocious.<br>large, white-furred bear, with a long neck, a stocky body, powerful legs, and sharp claws             |
| pembroke             |  | Experts<br>chatgpt | the smaller and straight-legged variety of corgi having pointed ears and a short tail<br>small, sturdy dog breed, with erect ears, a foxy face, and a docked tail (or naturally bobtail)                  |
| bengal tiger         |  | Experts<br>chatgpt | yellow-orange coats with dark stripes, white belly and limbs, and an orange tail with black rings<br>orange-brown coat with black stripes, white belly, and distinctive white markings above the eyes     |
| polar hare           |  | Experts<br>chatgpt | a large hare of northern North America; it is almost completely white in winter<br>large, white-furred hare with long ears and strong hind legs, found in Arctic regions                                  |
| gorilla              |  | Experts<br>chatgpt | the gorilla is strong and hairless on its face and ears. it has a high forehead and protruding jawbone<br>large, muscular primate with black or dark brown fur, a broad chest, and a prominent brow ridge |

| Name                       | Image                                                                               | Type               | Description                                                                                                                                                                                                                       |
|----------------------------|-------------------------------------------------------------------------------------|--------------------|-----------------------------------------------------------------------------------------------------------------------------------------------------------------------------------------------------------------------------------|
| African elephant           |    | Experts<br>chatgpt | an elephant native to Africa having enormous flapping ears and ivory tusks<br>massive, grey mammal with a long trunk, large ears, curved tusks, and wrinkled skin                                                                 |
| charolais                  |    | Experts<br>chatgpt | this breed of cattle is heavy, with weighing 700-1650 kg. they have white/cream coats and pink noses<br>large, white-colored breed of cattle with a muscular build, broad forehead, and short horns                               |
| Grevy's zebra              |    | Experts<br>chatgpt | it resembles a mule with a big head, elongated nostril openings, large round conical ears, and tall erect mane<br>large, wild equid with black and white stripes, a white belly, and a tall, erect mane                           |
| box turtle                 |    | Experts<br>chatgpt | it has a domed shell hinged at the bottom, allowing them to close it tightly and escape predators<br>small, domed shell with brown or olive-colored skin and a pattern of yellow or orange spots or lines                         |
| tuatara                    |    | Experts<br>chatgpt | a reptile with a greenish-grey lizard-like appearance found only on certain small islands near New Zealand<br>a reptile with a spiny crest, two rows of teeth, and a third "eye" on the top of its head                           |
| northern seahorse          |    | Experts<br>chatgpt | northern seahorses have long snouts and a curly tail, and can grow up to 8 inches in length<br>the northern seahorse has a small body covered in bony plates, a long snout, and a curled tail                                     |
| lowland burrowing treefrog |    | Experts<br>chatgpt | terrestrial burrowing nocturnal frog of grassy terrain and scrub forests having very hard upper surface of head<br>small, round-bodied frog with smooth skin, adapted for burrowing with short legs and a pointed snout           |
| rock beauty                |    | Experts<br>chatgpt | predominately black. The head and front half portion of the body, and the caudal fin are a bright yellow<br>bright yellow head, tail, pectoral fins; black body, dorsal, anal fins; abrupt color transitions                      |
| clingfish                  |   | Experts<br>chatgpt | very small (to 3 inches) flattened marine fish with a sucking disc on the abdomen for clinging to rocks etc<br>the clingfish has a flattened body with a suction cup-like pelvic disc, and ranges in color from brown to green    |
| porpoise                   |  | Experts<br>chatgpt | whales distinguishable from dolphins by their more compact build, smaller size, and curved blunt snout with spatulate teeth<br>small, grey marine mammal with a rounded head, a small dorsal fin, and a curved mouth              |
| manta                      |  | Experts<br>chatgpt | extremely large pelagic tropical ray with triangular pectoral fins, horn-shaped cephalic fins and large, forward-facing mouths<br>large, flat-bodied, wing-like fins, no tail, black or dark upper side, white or light underside |
| aglais                     |  | Experts<br>chatgpt | the wings of aglais are rusty red with a unique eyespot in black, blue, and yellow at each wingtip<br>eyespot on wings, blue-green-brown hues (European peacock butterfly)                                                        |
| woodland sunflower         |  | Experts<br>chatgpt | a wildflower native to the United States, which has bright yellow petals that surround a dark brown center<br>tall yellow flower with numerous thin petals surrounding a dark center disk, and green leaves                       |
| calliandra                 |  | Experts<br>chatgpt | the flowers are produced in cylindrical or globose inflorescences and have numerous long slender stamens<br>small shrub with fern-like leaves and vibrant, pink, powder-puff shaped flowers                                       |
| cistus salvifolius         |  | Experts<br>chatgpt | a shrub with fragrant, silver-green foliage and white flowers<br>a tall, bright yellow or orange flower often grown for its edible seeds and as an ornamental plant                                                               |
| power drill                |  | Experts<br>chatgpt | a hand tool with a rotating chuck driven by an electric motor for drilling<br>handheld tool with a motor and rotating chuck for drilling holes and fastening screws, often with a pistol grip                                     |
| clarinet                   |  | Experts<br>chatgpt | the clarinet is a single-reed instrument with a nearly cylindrical bore and a flared bell.<br>narrow, cylindrical woodwind instrument with a mouthpiece, reed, and numerous keys for playing different notes                      |
| off-road vehicle           |  | Experts<br>chatgpt | the off-road vehicles typically have four-wheel-drive, increased suspension, and large tires<br>large, sturdy vehicle with high ground clearance, wide tires, and typically four-wheel drive for use on unpaved terrain           |

Table A8: Examples of category descriptions of V3Det.

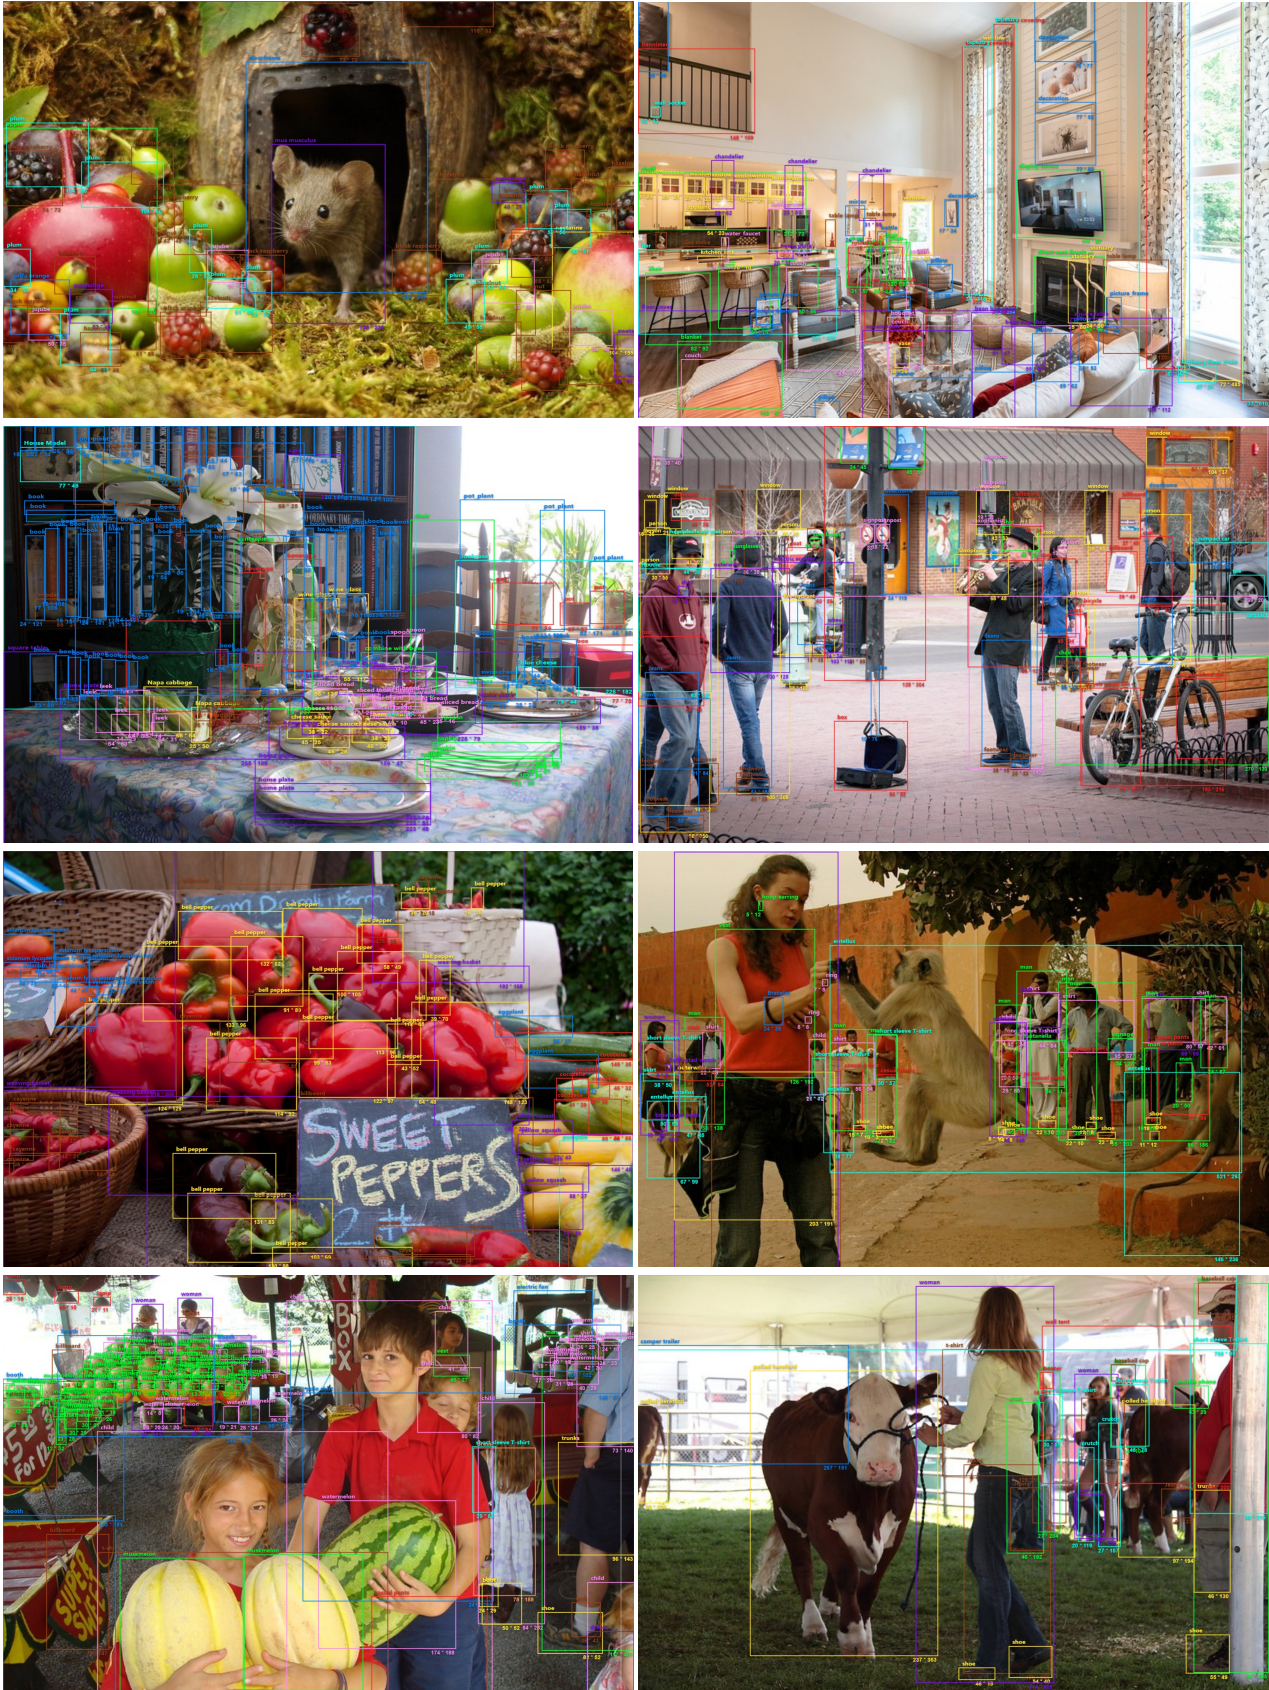

Figure A2: Visualizations of annotations in complex scenes. Each box is paired with category name and box size.



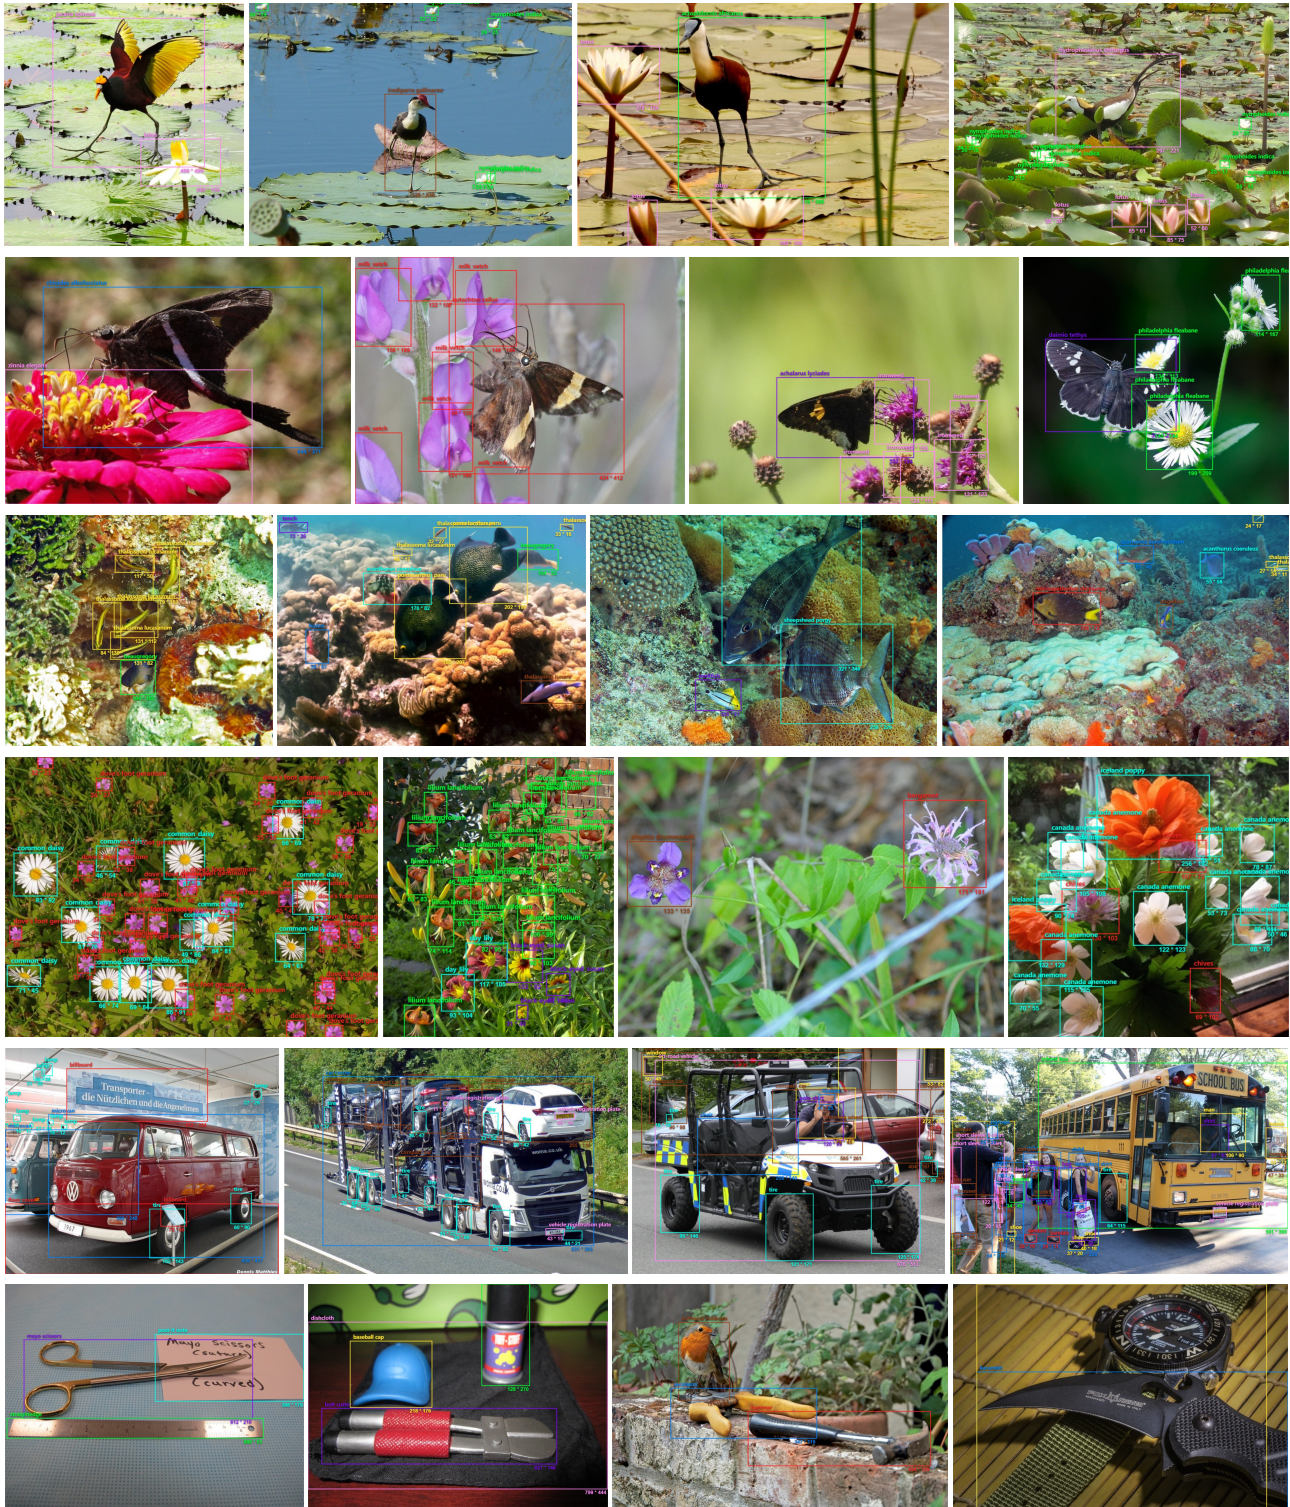

Figure A3: Visualizations of annotations in fine-grained categories. Each row shows a set of visually similar category annotations that are easily confused.

## References

- [1] Daniel Bolya, Sean Foley, James Hays, and Judy Hoffman. Tide: A general toolbox for identifying object detection errors. In *ECCV*, 2020. 2
- [2] Zhaowei Cai and Nuno Vasconcelos. Cascade r-cnn: High quality object detection and instance segmentation. *CVPR*, 2018. 1, 2
- [3] Kai Chen, Jiangmiao Pang, Jiaqi Wang, Yu Xiong, Xiaoxiao Li, Shuyang Sun, Wansen Feng, Ziwei Liu, Jianping Shi, Wanli Ouyang, Chen Change Loy, and Dahua Lin. Hybrid task cascade for instance segmentation. In *CVPR*, 2019. 1
- [4] Kai Chen, Jiaqi Wang, Jiangmiao Pang, Yuhang Cao, Yu Xiong, Xiaoxiao Li, Shuyang Sun, Wansen Feng, Ziwei Liu, Jiarui Xu, Zheng Zhang, Dazhi Cheng, Chenchen Zhu, Tianheng Cheng, Qijie Zhao, Buyu Li, Xin Lu, Rui Zhu, Yue Wu, Jifeng Dai, Jingdong Wang, Jianping Shi, Wanli Ouyang, Chen Change Loy, and Dahua Lin. MMDetection: Open mmlab detection toolbox and benchmark. *arXiv preprint arXiv:1906.07155*, 2019. 1
- [5] detrex contributors. detrex: An research platform for transformer-based object detection algorithms. <https://github.com/IDEA-Research/detrex>, 2022. 1
- [6] Yuxin Fang, Wen Wang, Binhui Xie, Quan Sun, Ledell Wu, Xinggang Wang, Tiejun Huang, Xinlong Wang, and Yue Cao. Eva: Exploring the limits of masked visual representation learning at scale. *arXiv*, 2022. 2
- [7] Golnaz Ghiasi, Yin Cui, Aravind Srinivas, Rui Qian, Tsung-Yi Lin, Ekin D. Cubuk, Quoc V. Le, and Barret Zoph. Simple copy-paste is a strong data augmentation method for instance segmentation. In *CVPR*, June 2021. 1
- [8] Agrim Gupta, Piotr Dollar, and Ross Girshick. LVIS: A dataset for large vocabulary instance segmentation. In *CVPR*, 2019. 1, 2
- [9] Kaiming He, Xiangyu Zhang, Shaoqing Ren, and Jian Sun. Deep residual learning for image recognition. In *CVPR*, 2016. 1, 2
- [10] Diederik P Kingma and Jimmy Ba. Adam: A method for stochastic optimization. *arXiv*, 2014. 1
- [11] Tsung-Yi Lin, Piotr Dollár, Ross B. Girshick, Kaiming He, Bharath Hariharan, and Serge J. Belongie. Feature pyramid networks for object detection. In *CVPR*, 2017. 1
- [12] Ze Liu, Yutong Lin, Yue Cao, Han Hu, Yixuan Wei, Zheng Zhang, Stephen Lin, and Baining Guo. Swin transformer: Hierarchical vision transformer using shifted windows. In *ICCV*, 2021. 1
- [13] Ilya Loshchilov and Frank Hutter. Decoupled weight decay regularization. In *ICLR*, 2018. 1
- [14] Alec Radford, Jong Wook Kim, Chris Hallacy, Aditya Ramesh, Gabriel Goh, Sandhini Agarwal, Girish Sastry, Amanda Askell, Pamela Mishkin, Jack Clark, et al. Learning transferable visual models from natural language supervision. In *ICML*. PMLR, 2021. 3
- [15] Shaoqing Ren, Kaiming He, Ross Girshick, and Jian Sun. Faster R-CNN: Towards real-time object detection with region proposal networks. In *NeurIPS*, 2015. 1, 2
- [16] Zhi Tian, Chunhua Shen, Hao Chen, and Tong He. FCOS: Fully convolutional one-stage object detection. *CoRR*, abs/1904.01355, 2019. 1
- [17] Jiaqi Wang, Wenwei Zhang, Yuhang Zang, Yuhang Cao, Jiangmiao Pang, Tao Gong, Kai Chen, Ziwei Liu, Chen Change Loy, and Dahua Lin. Seesaw loss for long-tailed instance segmentation. In *CVPR*, 2021. 2
- [18] Yuxin Wu, Alexander Kirillov, Francisco Massa, Wan-Yen Lo, and Ross Girshick. Detectron2. <https://github.com/facebookresearch/detectron2>, 2019. 1
- [19] Hao Zhang, Feng Li, Shilong Liu, Lei Zhang, Hang Su, Jun Zhu, Lionel Ni, and Harry Shum. Dino: Detr with improved denoising anchor boxes for end-to-end object detection. In *ICLR*, 2022. 1, 2
- [20] Yuanhan Zhang, Qinghong Sun, Yichun Zhou, Zexin He, Zhenfei Yin, Kun Wang, Lu Sheng, Yu Qiao, Jing Shao, and Ziwei Liu. Bamboo: Building mega-scale vision dataset continually with human-machine synergy. *arXiv*, 2022. 1
- [21] Yiwu Zhong, Jianwei Yang, Pengchuan Zhang, Chunyuan Li, Noel Codella, Liunian Harold Li, Luwei Zhou, Xiyang Dai, Lu Yuan, Yin Li, et al. Regionclip: Region-based language-image pretraining. In *CVPR*, 2022. 1, 3
- [22] Xingyi Zhou, Rohit Girdhar, Armand Joulin, Philipp Krähenbühl, and Ishan Misra. Detecting twenty-thousand classes using image-level supervision. In *ECCV*, 2022. 1, 3
- [23] Xingyi Zhou, Vladlen Koltun, and Philipp Krähenbühl. Probabilistic two-stage detection. *arXiv*, 2021. 1, 2
- [24] Xizhou Zhu, Weijie Su, Lewei Lu, Bin Li, Xiaogang Wang, and Jifeng Dai. Deformable detr: Deformable transformers for end-to-end object detection. *arXiv*, 2020. 1
